# Supplementary material for: Splice2Deep: An ensemble of deep convolutional neural networks for improved splice site prediction in genomic DNA
Source: PubMed Central journal article supplement — Gene X. 2020 May 13;5:100035. doi: 10.1016/j.gene.2020.100035 (PMC7285987; doi:10.1016/j.gene.2020.100035), 2020-05-13
Supplement: mmc1.pdf [file mmc1.pdf]

---

## SUPPLEMENTARY MATERIAL

# Splice2Deep: An Ensemble of Deep Convolutional Neural Networks for Improved Splice Site Prediction in Genomic DNA

Somayah Albaradei<sup>1,2\*</sup>, Arturo Magana-Mora<sup>1,3\*</sup>, Maha Thafar<sup>1,4</sup>, Mahmut Uludag<sup>1</sup>, Vladimir B. Bajic<sup>1</sup>, Takashi Gojobori<sup>1,5</sup>, Magbubah Essack<sup>1#</sup>, Boris R. Jankovic<sup>1#</sup>

<sup>1</sup>Computer, Electrical and Mathematical Sciences and Engineering Division (CEMSE), Computational Bioscience Research Center, Computer (CBRC), King Abdullah University of Science and Technology (KAUST), Thuwal 23955-6900, Kingdom of Saudi Arabia.

<sup>2</sup>Faculty of Computing and Information Technology, King Abdulaziz University, Kingdom of Saudi Arabia.

<sup>3</sup>Saudi Aramco, EXPEC-ARC, Drilling Technology Team, Dhahran, 31311, Kingdom of Saudi Arabia.

<sup>4</sup>Faculty of Computers and Information Systems, Taif University, Kingdom of Saudi Arabia.

<sup>5</sup>Biological and Environmental Sciences and Engineering Division (BESE), King Abdullah University of Science and Technology (KAUST), Thuwal 23955-6900, Kingdom of Saudi Arabia.

\*First author.

#To whom correspondence should be addressed. Tel: +966 (54) 470 0746; Email: [magbubah.essack@kaust.edu.sa](mailto:magbubah.essack@kaust.edu.sa); Email: [boris.jankovic@kaust.edu.sa](mailto:boris.jankovic@kaust.edu.sa)

---

**Supplementary Table S1.** Sensitivity (Sn) and Specificity (Sp) comparison of Splice2Deep and the state-of-the-art tools for the prediction of SS on the five selected organisms. N/A indicates that the tool is not available for that specific organism.

| Splice site | Model           | <i>Homo sapiens</i> |       | <i>Arabidopsis thaliana</i> |       | <i>Oryza sativa japonica</i> |       | <i>Drosophila melanogaster</i> |       | <i>Caenorhabditis elegans</i> |       |
|-------------|-----------------|---------------------|-------|-----------------------------|-------|------------------------------|-------|--------------------------------|-------|-------------------------------|-------|
|             |                 | Sp.                 | Sn.   | Sp.                         | Sn.   | Sp.                          | Sn.   | Sp.                            | Sn.   | Sp.                           | Sn.   |
| AcSS        | Genesplicer     | 97.3                | 69.28 | 97.67                       | 77.85 | 97.5                         | 70.92 | 93.4                           | 83.93 | N/A                           | N/A   |
|             | SplicePredictor | 91.86               | 84.16 | 96.83                       | 87.44 | 98.2                         | 80.65 | 94.92                          | 82.47 | N/A                           | N/A   |
|             | DeepSS          | 92.93               | 90.18 | N/A                         | N/A   | N/A                          | N/A   | N/A                            | N/A   | 90.49                         | 90.86 |
|             | Splicerover     | 97.39               | 90.77 | 93.12                       | 94.02 | N/A                          | N/A   | N/A                            | N/A   | N/A                           | N/A   |
|             | Splice2Deep     | 97.8                | 95.61 | 94.86                       | 95.53 | 93.62                        | 94.16 | 95.04                          | 94.09 | 97.78                         | 98.38 |
| DoSS        | Genesplicer     | 98.6                | 60.36 | 97.58                       | 84.12 | 97.71                        | 74.62 | 93.7                           | 86.66 | N/A                           | N/A   |
|             | SplicePredictor | 97.24               | 79.15 | 96.04                       | 88.94 | 97.86                        | 77.14 | 96.12                          | 81.46 | N/A                           | N/A   |
|             | DeepSS          | 93.63               | 91.18 | N/A                         | N/A   | N/A                          | N/A   | N/A                            | N/A   | 91.94                         | 91.68 |
|             | Splicerover     | 96.44               | 90.01 | 94.12                       | 95.02 | N/A                          | N/A   | N/A                            | N/A   | N/A                           | N/A   |
|             | Splice2Deep     | 98.83               | 95.93 | 95.67                       | 95.5  | 94.41                        | 94.25 | 93.71                          | 90.46 | 97.74                         | 97.63 |
