# Supplementary material for: Splice2Deep: An ensemble of deep convolutional neural networks for improved splice site prediction in genomic DNA
Source: PubMed Central journal article supplement — Gene X. 2020 May 13;5:100035. doi: 10.1016/j.gene.2020.100035 (PMC7285987; doi:10.1016/j.gene.2020.100035), 2020-05-13
Supplement: mmc3.pdf [file mmc3.pdf]

---

## SUPPLEMENTARY MATERIAL

# Splice2Deep: An Ensemble of Deep Convolutional Neural Networks for Improved Splice Site Prediction in Genomic DNA

Somayah Albaradei<sup>1,2\*</sup>, Arturo Magana-Mora<sup>1,3\*</sup>, Maha Thafar<sup>1,4</sup>, Mahmut Uludag<sup>1</sup>, Vladimir B. Bajic<sup>1</sup>, Takashi Gojobori<sup>1,5</sup>, Magbubah Essack<sup>1#</sup>, Boris R. Jankovic<sup>1#</sup>

<sup>1</sup>Computer, Electrical and Mathematical Sciences and Engineering Division (CEMSE), Computational Bioscience Research Center, Computer (CBRC), King Abdullah University of Science and Technology (KAUST), Thuwal 23955-6900, Kingdom of Saudi Arabia.

<sup>2</sup>Faculty of Computing and Information Technology, King Abdulaziz University, Kingdom of Saudi Arabia.

<sup>3</sup>Saudi Aramco, EXPEC-ARC, Drilling Technology Team, Dhahran, 31311, Kingdom of Saudi Arabia.

<sup>4</sup>Faculty of Computers and Information Systems, Taif University, Kingdom of Saudi Arabia.

<sup>5</sup>Biological and Environmental Sciences and Engineering Division (BESE), King Abdullah University of Science and Technology (KAUST), Thuwal 23955-6900, Kingdom of Saudi Arabia.

\*First author.

#To whom correspondence should be addressed. Tel: +966 (54) 470 0746; Email: [magbubah.essack@kaust.edu.sa](mailto:magbubah.essack@kaust.edu.sa); Email: [boris.jankovic@kaust.edu.sa](mailto:boris.jankovic@kaust.edu.sa)

---

**Supplementary Table S3.** Accuracy (Acc), Sensitivity (Sn), and Specificity (Sp) from the cross-organism validation obtained by using the *Arabidopsis thaliana* model and testing on the other organisms. N/A indicates that the tool is not available for that specific organism.

| Splice site | Model            | <i>Homo sapiens</i> |        |        | <i>Arabidopsis thaliana</i> |        |        | <i>Oryza sativa japonica</i> |        |        | <i>Drosophila melanogaster</i> |        |        | <i>Caenorhabditis elegans</i> |        |        |
|-------------|------------------|---------------------|--------|--------|-----------------------------|--------|--------|------------------------------|--------|--------|--------------------------------|--------|--------|-------------------------------|--------|--------|
|             |                  | Sp.                 | Sn.    | Acc.   | Sp.                         | Sn.    | Acc.   | Sp.                          | Sn.    | Acc.   | Sp.                            | Sn.    | Acc.   | Sp.                           | Sn.    | Acc.   |
| AcSS        | Genesplicer      | 0.9734              | 0.4175 | 0.6955 | 0.9767                      | 0.7785 | 0.8776 | 0.9859                       | 0.6837 | 0.8348 | 0.9791                         | 0.4178 | 0.6984 | 0.9910                        | 0.3950 | 0.6930 |
|             | SplicePredict or | 0.9566              | 0.5229 | 0.7398 | 0.9683                      | 0.8744 | 0.9213 | 0.9792                       | 0.7902 | 0.8847 | 0.9626                         | 0.6496 | 0.8061 | 0.9863                        | 0.6287 | 0.8075 |
|             | DeepSS           | N/A                 | N/A    | N/A    | N/A                         | N/A    | N/A    | N/A                          | N/A    | N/A    | N/A                            | N/A    | N/A    | N/A                           | N/A    | N/A    |
|             | Splicerover      | 0.8847              | 0.8837 | 0.8857 | 0.9312                      | 0.9402 | 0.9435 | 0.9030                       | 0.8745 | 0.8730 | 0.8787                         | 0.8502 | 0.8487 | 0.9049                        | 0.8764 | 0.8749 |
|             | Splice2Deep      | 0.8993              | 0.8983 | 0.9003 | 0.9486                      | 0.9553 | 0.9521 | 0.9131                       | 0.8846 | 0.8851 | 0.8872                         | 0.8587 | 0.8572 | 0.9201                        | 0.8916 | 0.8901 |
| DoSS        | Genesplicer      | 0.9685              | 0.4222 | 0.6954 | 0.9758                      | 0.8412 | 0.9085 | 0.9866                       | 0.7439 | 0.8652 | 0.9817                         | 0.5466 | 0.7641 | 0.9928                        | 0.5252 | 0.7590 |
|             | SplicePredict or | 0.9546              | 0.4266 | 0.6906 | 0.9604                      | 0.8894 | 0.9249 | 0.9776                       | 0.7551 | 0.8663 | 0.9651                         | 0.6444 | 0.8048 | 0.9850                        | 0.6846 | 0.8348 |
|             | DeepSS           | N/A                 | N/A    | N/A    | N/A                         | N/A    | N/A    | N/A                          | N/A    | N/A    | N/A                            | N/A    | N/A    | N/A                           | N/A    | N/A    |
|             | Splicerover      | 0.8837              | 0.8827 | 0.8847 | 0.9412                      | 0.9502 | 0.9425 | 0.9040                       | 0.8755 | 0.8740 | 0.8807                         | 0.8522 | 0.8507 | 0.9069                        | 0.8784 | 0.8769 |
|             | Splice2Deep      | 0.8983              | 0.8973 | 0.8993 | 0.9567                      | 0.9550 | 0.9559 | 0.9141                       | 0.8856 | 0.8841 | 0.8902                         | 0.8617 | 0.8602 | 0.9231                        | 0.8946 | 0.8931 |
