# Supplementary material for: Splice2Deep: An ensemble of deep convolutional neural networks for improved splice site prediction in genomic DNA
Source: PubMed Central journal article supplement — Gene X. 2020 May 13;5:100035. doi: 10.1016/j.gene.2020.100035 (PMC7285987; doi:10.1016/j.gene.2020.100035), 2020-05-13
Supplement: mmc6.pdf [file mmc6.pdf]

---

## SUPPLEMENTARY MATERIAL

# Splice2Deep: An Ensemble of Deep Convolutional Neural Networks for Improved Splice Site Prediction in Genomic DNA

Somayah Albaradei<sup>1,2\*</sup>, Arturo Magana-Mora<sup>1,3\*</sup>, Maha Thafar<sup>1,4</sup>, Mahmut Uludag<sup>1</sup>, Vladimir B. Bajic<sup>1</sup>, Takashi Gojobori<sup>1,5</sup>, Magbubah Essack<sup>1#</sup>, Boris R. Jankovic<sup>1#</sup>

<sup>1</sup>Computer, Electrical and Mathematical Sciences and Engineering Division (CEMSE), Computational Bioscience Research Center, Computer (CBRC), King Abdullah University of Science and Technology (KAUST), Thuwal 23955-6900, Kingdom of Saudi Arabia.

<sup>2</sup>Faculty of Computing and Information Technology, King Abdulaziz University, Kingdom of Saudi Arabia.

<sup>3</sup>Saudi Aramco, EXPEC-ARC, Drilling Technology Team, Dhahran, 31311, Kingdom of Saudi Arabia.

<sup>4</sup>Faculty of Computers and Information Systems, Taif University, Kingdom of Saudi Arabia.

<sup>5</sup>Biological and Environmental Sciences and Engineering Division (BESE), King Abdullah University of Science and Technology (KAUST), Thuwal 23955-6900, Kingdom of Saudi Arabia.

\*First author.

#To whom correspondence should be addressed. Tel: +966 (54) 470 0746; Email: [magbubah.essack@kaust.edu.sa](mailto:magbubah.essack@kaust.edu.sa); Email: [boris.jankovic@kaust.edu.sa](mailto:boris.jankovic@kaust.edu.sa)

---

**Supplementary Table S6.** Accuracy (Acc), Sensitivity (Sn), and Specificity (Sp) from the cross-organism validation obtained by using the *Caenorhabditis elegans* model and testing on the other organisms. N/A indicates that the tool is not available for that specific organism.

| Splice site | Model           | <i>Homo sapiens</i> |        |        | <i>Arabidopsis thaliana</i> |        |        | <i>Oryza sativa japonica</i> |        |        | <i>Drosophila melanogaster</i> |        |        | <i>Caenorhabditis elegans</i> |        |        |
|-------------|-----------------|---------------------|--------|--------|-----------------------------|--------|--------|------------------------------|--------|--------|--------------------------------|--------|--------|-------------------------------|--------|--------|
|             |                 | Sp.                 | Sn.    | Acc.   | Sp.                         | Sn.    | Acc.   | Sp.                          | Sn.    | Acc.   | Sp.                            | Sn.    | Acc.   | Sp.                           | Sn.    | Acc.   |
| AcSS        | Genesplicer     | N/A                 | N/A    | N/A    | N/A                         | N/A    | N/A    | N/A                          | N/A    | N/A    | N/A                            | N/A    | N/A    | N/A                           | N/A    | N/A    |
|             | SplicePredictor | N/A                 | N/A    | N/A    | N/A                         | N/A    | N/A    | N/A                          | N/A    | N/A    | N/A                            | N/A    | N/A    | N/A                           | N/A    | N/A    |
|             | DeepSS          | 0.8904              | 0.8914 | 0.8909 | 0.8904                      | 0.8954 | 0.8929 | 0.8704                       | 0.8804 | 0.8919 | 0.9404                         | 0.9309 | 0.9207 | 0.9049                        | 0.9086 | 0.9332 |
|             | Splicerover     | N/A                 | N/A    | N/A    | N/A                         | N/A    | N/A    | N/A                          | N/A    | N/A    | N/A                            | N/A    | N/A    | N/A                           | N/A    | N/A    |
|             | Splice2Deep     | 0.9404              | 0.9414 | 0.9409 | 0.9304                      | 0.9354 | 0.9329 | 0.9104                       | 0.9134 | 0.9119 | 0.9604                         | 0.9509 | 0.9407 | 0.9778                        | 0.9838 | 0.9808 |
| DoSS        | Genesplicer     | N/A                 | N/A    | N/A    | N/A                         | N/A    | N/A    | N/A                          | N/A    | N/A    | N/A                            | N/A    | N/A    | N/A                           | N/A    | N/A    |
|             | SplicePredictor | N/A                 | N/A    | N/A    | N/A                         | N/A    | N/A    | N/A                          | N/A    | N/A    | N/A                            | N/A    | N/A    | N/A                           | N/A    | N/A    |
|             | DeepSS          | 0.9104              | 0.8934 | 0.9019 | 0.9204                      | 0.9054 | 0.9129 | 0.8804                       | 0.8904 | 0.9019 | 0.9504                         | 0.9309 | 0.9405 | 0.9194                        | 0.9168 | 0.940  |
|             | Splicerover     | N/A                 | N/A    | N/A    | N/A                         | N/A    | N/A    | N/A                          | N/A    | N/A    | N/A                            | N/A    | N/A    | N/A                           | N/A    | N/A    |
|             | Splice2Deep     | 0.9604              | 0.9434 | 0.9519 | 0.9604                      | 0.9454 | 0.9529 | 0.9204                       | 0.9234 | 0.9219 | 0.9704                         | 0.9509 | 0.9497 | 0.9774                        | 0.9763 | 0.9768 |
